# Supplementary material for: Structural Characterization and Cytotoxic Activity Evaluation of Ulvan Polysaccharides Extracted from the Green Algae Ulva papenfussii
Source: MDPI journal article supplement (doi:10.3390/md21110556), 2023-10-25
Supplement: s1 [file s1]

# Supplementary Material

Article

## Structural Characterization and Cytotoxic Activity Evaluation of Ulvan Polysaccharides extracted from Green Algae *Ulva papenfussii*

Vy Ha Nguyen Tran <sup>1</sup>, Maria Dalgaard Mikkelsen <sup>2</sup>, Hai Bang Truong <sup>3,4</sup>, Hieu Nhu Mai Vo <sup>1</sup>,  
Thinh Duc Pham <sup>1</sup>, Hang Thi Thuy Cao <sup>1</sup>, Thuan Thi Nguyen <sup>1</sup>, Anne S. Meyer <sup>2</sup>,  
Thuy Thu Thi Thanh <sup>5</sup> and Tran Thi Thanh Van <sup>1, \*</sup>

<sup>1</sup> NhaTrang Institute of Technology Research and Application, Vietnam Academy of Science and Technology, 02 Hung Vuong Street, NhaTrang 650000, Vietnam; havy@nitra.vast.vn (V.H.N.T.); nhuhieu@nitra.vast.vn (H.N.M.V.); ducthinh.nitra@gmail.com (T.D.P.); caohang.nitra@gmail.com (H.T.T.C.); nguyenthuan@nitra.vast.vn (T.T.N.)

<sup>2</sup> Section for Protein Chemistry and Enzyme Technology, DTU Bioengineering-Department of Biotechnology and Biomedicine, Technical University of Denmark, 2800 Kongens Lyngby, Denmark; mdami@dtu.dk (M.D.M.); asme@dtu.dk (A.S.M.)

<sup>3</sup> Optical Materials Research Group, Science and Technology Advanced Institute, Van Lang University, 69/68 Dang Thuy Tram Street, Ward 13, Binh Thanh District, Ho Chi Minh City 70000, Vietnam; truonghaibang@vlu.edu.vn

<sup>4</sup> Faculty of Applied Technology, School of Technology, Van Lang University, 69/68 Dang Thuy Tram Street, Ward 13, Binh Thanh District, Ho Chi Minh City 70000, Vietnam

<sup>5</sup> Institute of Chemistry, Vietnam Academy of Science and Technology, 18 Hoang Quoc Viet Street, Hanoi 10000, Vietnam; thuyttt@ich.vast.vn

\* Correspondence: vanvvlnt@yahoo.com.vn; Tel.: +84-982140850

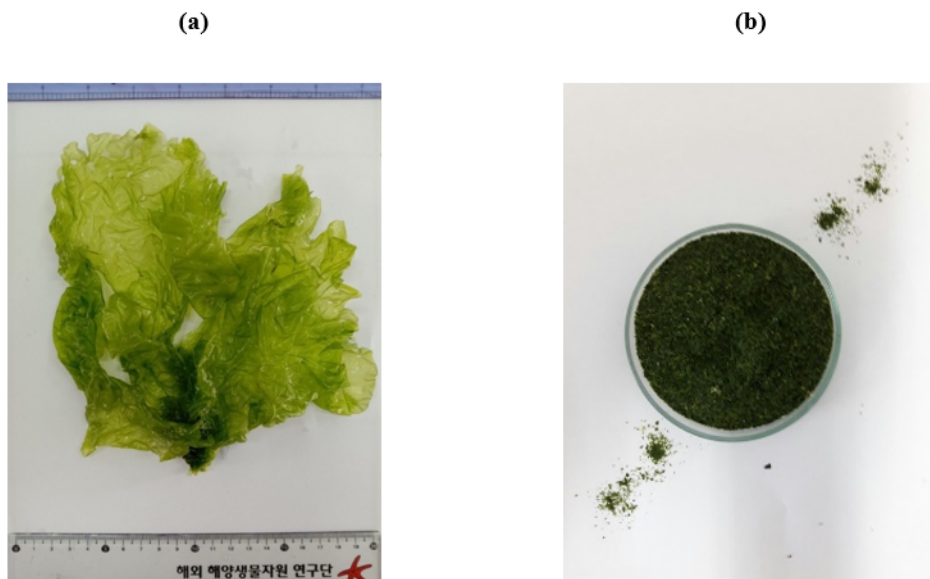

**Figure S1.** Green algae *Ulva papenfussii* collected from the Nha Trang Bay, Khanh Hoa province, Vietnam; (a) green algae; (b) powder of *Ulva papenfussii*.

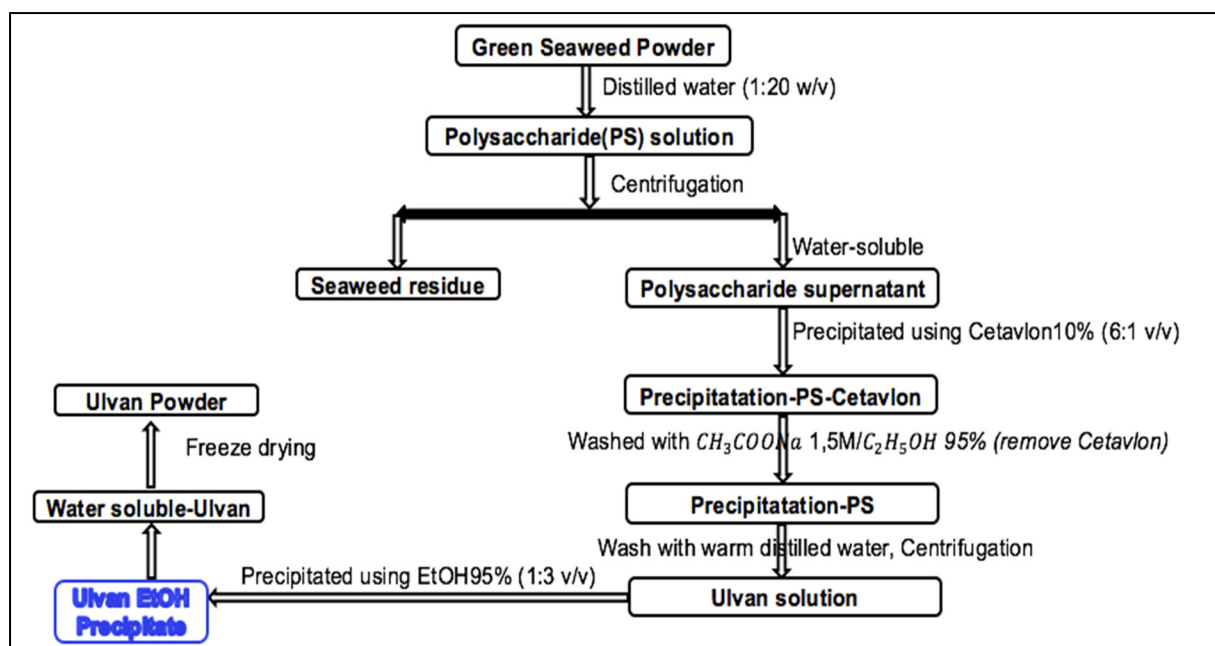

**Figure S2.** Extraction process of ulvan from the green seaweed *U. papenfussii*

## Data S1: Predicting toxicity using the QSAR method for ulvan

### 1. Explanation for the toxicity endpoints used in QSAR modeling:

- ♦ 96-hr acute fathead minnow toxicity LC<sub>50</sub>: concentration of the tested compound in solution (mg/L) which is lethal to half of exposed fathead minnows in 96 hr.
- ♦ 48-hr *Daphnia magna* LC<sub>50</sub>: concentration of the test chemical in water in mg/L that is lethal to 50% of exposed *Daphnia magna* after 48 hr
- ♦ 48-hr *Tetrahymena pyriformis* IGC<sub>50</sub>: concentration of the test chemical in water in mg/L that results in 50% growth inhibition to *Tetrahymena pyriformis* after 48 hr
- ♦ Oral rat LD<sub>50</sub>: amount of chemical in mg/kg body weight that is lethal to 50% of rats after oral ingestion
- ♦ Developmental toxicity: binary indication of whether a chemical can interfere with normal development of humans or animals
- ♦ Ames mutagenicity: binary indication of whether a chemical induces revertant colony growth in any strain of *Salmonella typhimurium*.

### 2. Typical valid model predictions and statistics for A3s structure:

#### 2.1. Predicted Fathead minnow LC50 (96 hr)

##### Prediction results

| Endpoint                                              | Experimental value | Predicted value |
|-------------------------------------------------------|--------------------|-----------------|
| Fathead minnow LC <sub>50</sub> (96 hr) -Log10(mol/L) | N/A                | 2.05            |
| Fathead minnow LC <sub>50</sub> (96 hr) mg/L          | N/A                | 3755.86         |

##### Cluster model predictions and statistics

| Cluster model        | Test chemical descriptor values | Prediction interval -Log10(mol/L) | r <sup>2</sup> | q <sup>2</sup> | #chemicals | Applicability Domain |
|----------------------|---------------------------------|-----------------------------------|----------------|----------------|------------|----------------------|
| <a href="#">1310</a> | <a href="#">Descriptors</a>     | 6.54 ± 1.31                       | 0.821          | 0.703          | 60         | OK                   |
| <a href="#">1311</a> | <a href="#">Descriptors</a>     | 5.46 ± 1.48                       | 0.724          | 0.646          | 92         | OK                   |
| <a href="#">1316</a> | <a href="#">Descriptors</a>     | 1.76 ± 1.40                       | 0.758          | 0.734          | 649        | OK                   |

## Model # 1310

| Parameter           | Value                                   |
|---------------------|-----------------------------------------|
| Endpoint            | Fathead minnow LC <sub>50</sub> (96 hr) |
| r <sup>2</sup>      | 0.821                                   |
| q <sup>2</sup>      | 0.703                                   |
| Number of chemicals | 60                                      |
| Model               | 1310                                    |

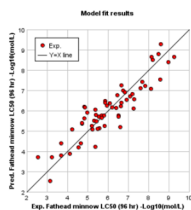

| Coefficient              | Definition                                                                                                 | Value   | Uncertainty* |
|--------------------------|------------------------------------------------------------------------------------------------------------|---------|--------------|
| xch6                     | Simple 6th order chain chi index                                                                           | -7.9194 | 2.9293       |
| StN                      | Sum of ( $\pi$ ) E-States (StN)                                                                            | 0.2559  | 0.0811       |
| SssS                     | Sum of ( $\pi$ ) E-States (SssS)                                                                           | 1.0083  | 0.6295       |
| iedmm                    | Mean information content on the edge distance magnitude                                                    | 1.2217  | 0.5758       |
| MDEC14                   | Molecular distance edge between all primary and quaternary carbons                                         | 0.1283  | 0.1240       |
| ATS2v                    | Broto-Moreau autocorrelation of a topological structure - lag 2 / weighted by atomic van der Waals volumes | 3.4556  | 1.4594       |
| ATS4v                    | Broto-Moreau autocorrelation of a topological structure - lag 4 / weighted by atomic van der Waals volumes | -2.1289 | 1.3255       |
| MATS7m                   | Moran autocorrelation - lag 7 / weighted by atomic masses                                                  | 1.4475  | 0.5324       |
| MATS1e                   | Moran autocorrelation - lag 1 / weighted by atomic Sanderson electronegativities                           | 3.7709  | 1.5065       |
| GATS7p                   | Geary autocorrelation - lag 7 / weighted by atomic polarizabilities                                        | 0.7401  | 0.2507       |
| XLOGP2                   | Wang octanol water partition coefficient squared                                                           | -0.0330 | 0.0130       |
| -CH2- [aliphatic attach] | -CH2- [aliphatic attach] fragment count                                                                    | -0.1286 | 0.0711       |
| Model intercept          | Intercept of multilinear regression model                                                                  | -6.7559 | 2.9132       |

\* value for 90% confidence interval

Model equation:  
 Fathead minnow LC<sub>50</sub> (96 hr) = -7.9194\*(xch6) + 0.2559\*(StN) + 1.0083\*(SssS) + 1.2217\*(iedmm) + 0.1283\*(MDEC14) + 3.4556\*(ATS2v) - 2.1289\*(ATS4v) + 1.4475\*(MATS7m) + 3.7709\*(MATS1e) + 0.7401\*(GATS7p) - 0.0330\*(XLOGP2) - 0.1286\*(-CH2- [aliphatic attach]) - 6.7559

## Model # 1311

| Parameter           | Value                                   |
|---------------------|-----------------------------------------|
| Endpoint            | Fathead minnow LC <sub>50</sub> (96 hr) |
| r <sup>2</sup>      | 0.724                                   |
| q <sup>2</sup>      | 0.646                                   |
| Number of chemicals | 92                                      |
| Model               | 1311                                    |

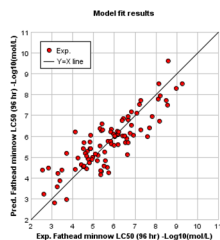

| Coefficient            | Definition                                                                                  | Value   | Uncertainty* |
|------------------------|---------------------------------------------------------------------------------------------|---------|--------------|
| SdsuC                  | Sum of ( $\pi$ ) E-States (SdsuC)                                                           | 0.3796  | 0.1372       |
| StN                    | Sum of ( $\pi$ ) E-States (StN)                                                             | 0.2509  | 0.0906       |
| SsCl                   | Sum of ( $\pi$ ) E-States (SsCl)                                                            | 0.0207  | 0.0173       |
| ib                     | Information bond index                                                                      | 0.0276  | 0.0208       |
| BELm4                  | Lowest eigenvalue n. 4 of Burden matrix / weighted by atomic masses                         | -3.2211 | 1.2898       |
| BELv4                  | Lowest eigenvalue n. 4 of Burden matrix / weighted by atomic van der Waals volumes          | 2.7971  | 1.9056       |
| Lop                    | Lopping centric index                                                                       | -0.5469 | 0.3154       |
| ATS6m                  | Broto-Moreau autocorrelation of a topological structure - lag 6 / weighted by atomic masses | 0.6691  | 0.3388       |
| GATS6e                 | Geary autocorrelation - lag 6 / weighted by atomic Sanderson electronegativities            | 0.4558  | 0.3481       |
| SRW07                  | Self-returning walk count of order 7                                                        | 0.0010  | 0.0009       |
| -S- [aliphatic attach] | -S- [aliphatic attach] fragment count                                                       | 1.6066  | 0.7428       |
| Model intercept        | Intercept of multilinear regression model                                                   | 3.3209  | 1.7118       |

\* value for 90% confidence interval

Model equation:  
 Fathead minnow LC<sub>50</sub> (96 hr) = 0.3796\*(SdsuC) + 0.2509\*(StN) + 0.0207\*(SsCl) + 0.0276\*(ib) - 3.2211\*(BELm4) + 2.7971\*(BELv4) - 0.5469\*(Lop) + 0.6691\*(ATS6m) + 0.4558\*(GATS6e) + 0.0010\*(SRW07) + 1.6066\*(-S- [aliphatic attach]) + 3.3209

## Descriptor Values

| Descriptor                    | Value   | Coefficient | Value × Coefficient |
|-------------------------------|---------|-------------|---------------------|
| xch6                          | 0.0907  | -7.9194     | -0.72               |
| StN                           | 0.0000  | 0.2559      | 0.00                |
| SssS                          | 0.0000  | 1.0083      | 0.00                |
| iedmm                         | 8.3545  | 1.2217      | 10.21               |
| MDEC14                        | 0.0000  | 0.1283      | 0.00                |
| ATS2v                         | 3.2849  | 3.4556      | 11.35               |
| ATS4v                         | 3.3025  | -2.1289     | -7.03               |
| MATS7m                        | -0.1545 | 1.4475      | -0.22               |
| MATS1e                        | -0.1864 | 3.7709      | -0.70               |
| GATS7p                        | 1.0592  | 0.7401      | 0.78                |
| XLOGP2                        | 11.3165 | -0.0330     | -0.37               |
| -CH2- [aliphatic attach]      | 0.0000  | -0.1286     | 0.00                |
| Model intercept               | 1.0000  | -6.7559     | -6.7559             |
| Predicted value -Log10(mol/L) |         |             | 6.54                |

## Descriptor Values

| Descriptor                    | Value   | Coefficient | Value × Coefficient |
|-------------------------------|---------|-------------|---------------------|
| SdsuC                         | -1.6841 | 0.3796      | -0.64               |
| StN                           | 0.0000  | 0.2509      | 0.00                |
| SsCl                          | 0.0000  | 0.0207      | 0.00                |
| ib                            | 13.7546 | 0.0276      | 0.38                |
| BELm4                         | 1.3396  | -3.2211     | -4.32               |
| BELv4                         | 1.4802  | 2.7971      | 4.14                |
| Lop                           | 1.1581  | -0.5469     | -0.63               |
| ATS6m                         | 4.1335  | 0.6691      | 2.77                |
| GATS6e                        | 0.9753  | 0.4558      | 0.44                |
| SRW07                         | 0.0000  | 0.0010      | 0.00                |
| -S- [aliphatic attach]        | 0.0000  | 1.6066      | 0.00                |
| Model intercept               | 1.0000  | 3.3209      | 3.3209              |
| Predicted value -Log10(mol/L) |         |             | 5.46                |



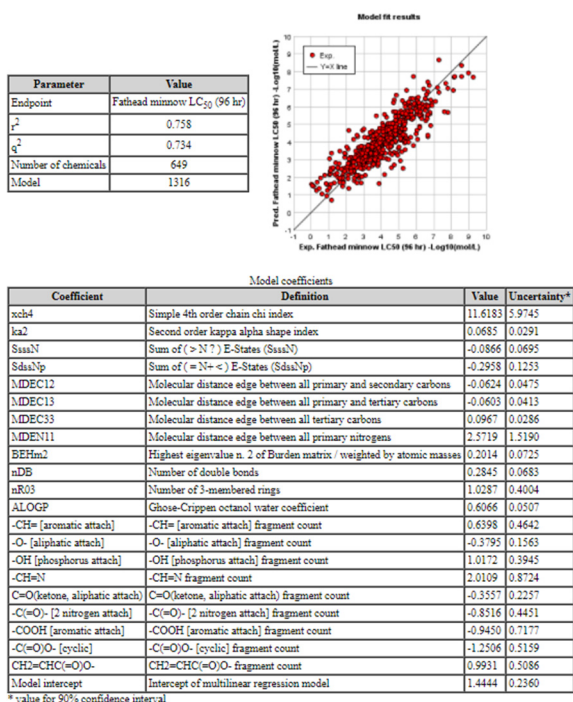

Descriptor Values

| Descriptor                    | Value   | Coefficient | Value × Coefficient |
|-------------------------------|---------|-------------|---------------------|
| xch4                          | 0.0000  | 11.6183     | 0.00                |
| ka2                           | 8.2920  | 0.0685      | 0.57                |
| SsssN                         | 0.0000  | -0.0866     | 0.00                |
| SdssNp                        | 0.0000  | -0.2958     | 0.00                |
| MDEC12                        | 0.0000  | -0.0624     | 0.00                |
| MDEC13                        | 2.8783  | -0.0603     | -0.17               |
| MDEC33                        | 17.6551 | 0.0967      | 1.71                |
| MDEN11                        | 0.0000  | 2.5719      | 0.00                |
| BEHm2                         | 3.8340  | 0.2014      | 0.77                |
| nDB                           | 3.0000  | 0.2845      | 0.85                |
| nR03                          | 0.0000  | 1.0287      | 0.00                |
| ALOGP                         | -3.7425 | 0.6066      | -2.27               |
| -CH= [aromatic attach]        | 0.0000  | 0.6398      | 0.00                |
| -O- [aliphatic attach]        | 3.0000  | -0.3795     | -1.14               |
| -OH [phosphorus attach]       | 0.0000  | 1.0172      | 0.00                |
| -CH=N                         | 0.0000  | 2.0109      | 0.00                |
| C=O(ketone, aliphatic attach) | 0.0000  | -0.3557     | 0.00                |
| -C(=O)- [2 nitrogen attach]   | 0.0000  | -0.8516     | 0.00                |
| -COOH [aromatic attach]       | 0.0000  | -0.9450     | 0.00                |
| -C(=O)O- [cyclic]             | 0.0000  | -1.2506     | 0.00                |
| CH2=CHC(=O)O-                 | 0.0000  | 0.9931      | 0.00                |
| Model intercept               | 1.0000  | 1.4444      | 1.4444              |
| Predicted value -Log10(mol/L) |         |             | 1.76                |

## 2.2. Predicted *Daphnia magna* LC<sub>50</sub> (48 hr)

Prediction results

| Endpoint                                              | Experimental value | Predicted value <sup>b</sup> |
|-------------------------------------------------------|--------------------|------------------------------|
| T. pyriformis IGC <sub>50</sub> (48 hr) -Log10(mol/L) | N/A                | N/A                          |

## 2.3. Predicted Oral rat LD<sub>50</sub>

Prediction results

| Endpoint                                 | Experimental value | Predicted value | Prediction interval    |
|------------------------------------------|--------------------|-----------------|------------------------|
| Oral rat LD <sub>50</sub> -Log10(mol/kg) | N/A                | 2.22            | 1.65 ≤ Tox ≤ 2.79      |
| Oral rat LD <sub>50</sub> mg/kg          | N/A                | 2512.81         | 675.36 ≤ Tox ≤ 9349.46 |

# Cluster model predictions and statistics

| Cluster model         | Test chemical descriptor values | Prediction interval<br>-Log10(mol/kg) | r <sup>2</sup> | q <sup>2</sup> | #chemicals | Applicability Domain |
|-----------------------|---------------------------------|---------------------------------------|----------------|----------------|------------|----------------------|
| <a href="#">11695</a> | <a href="#">Descriptors</a>     | 2.00 ± 0.79                           | 0.796          | 0.712          | 86         | OK                   |
| <a href="#">11750</a> | <a href="#">Descriptors</a>     | 1.25 ± 0.98                           | 0.649          | 0.534          | 96         | OK                   |
| <a href="#">11722</a> | <a href="#">Descriptors</a>     | 2.79 ± 0.73                           | 0.776          | 0.722          | 93         | OK                   |
| <a href="#">11813</a> | <a href="#">Descriptors</a>     | 2.41 ± 0.79                           | 0.747          | 0.679          | 110        | OK                   |

Model # 11695

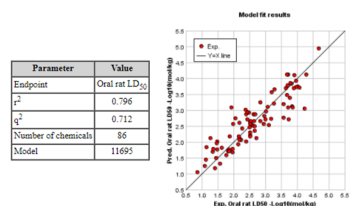

| Parameter           | Value                     |
|---------------------|---------------------------|
| Endpoint            | Oral rat LD <sub>50</sub> |
| r <sup>2</sup>      | 0.796                     |
| q <sup>2</sup>      | 0.712                     |
| Number of chemicals | 86                        |
| Model               | 11695                     |

| Coefficient                   | Definition                                                                                  | Value   | Uncertainty* |
|-------------------------------|---------------------------------------------------------------------------------------------|---------|--------------|
| xvch5                         | Valence 5th order chain chi index                                                           | 3.2600  | 2.0608       |
| SdsCH                         | Sum of ( = CH <sup>+</sup> ) E-States (SdsCH)                                               | -0.0849 | 0.0319       |
| icycem                        | Mean information on the vertex cycle matrix equality                                        | 1.1841  | 0.5963       |
| MDEC22                        | Molecular distance edge between all secondary carbons                                       | 0.0730  | 0.0236       |
| MDEC44                        | Molecular distance edge between all quaternary carbons                                      | 0.4774  | 0.4189       |
| BEHe3                         | Highest eigenvalue n. 3 of Burden matrix / weighted by atomic Sanderson electronegativities | 1.4600  | 0.9103       |
| nR04                          | Number of 4-membered rings                                                                  | -1.0660 | 0.3509       |
| MATS7m                        | Moran autocorrelation - lag 7 / weighted by atomic masses                                   | 1.2755  | 0.4105       |
| MATS6p                        | Moran autocorrelation - lag 6 / weighted by atomic polarizabilities                         | 0.7835  | 0.5405       |
| GATS6e                        | Geary autocorrelation - lag 6 / weighted by atomic Sanderson electronegativities            | -4.5908 | 0.3235       |
| C=O(ketone, aliphatic attach) | C=O(ketone, aliphatic attach) fragment count                                                | 0.3372  | 0.2545       |
| C=C(olefinic attach)          | C=C(olefinic attach) fragment count                                                         | 0.9623  | 0.2448       |
| C=O(O- [cyclic])              | C=O(O- [cyclic]) fragment count                                                             | 0.2454  | 0.2428       |
| CF3 [aliphatic attach]        | CF3 [aliphatic attach] fragment count                                                       | 0.9909  | 0.5804       |
| Model intercept               | Intercept of multilinear regression model                                                   | -3.4444 | 3.2668       |

\* value for 90% confidence interval

Model equation:  
Oral rat LD<sub>50</sub> = 3.2600\*(xvch5) - 0.0849\*(SdsCH) + 1.1841\*(icycem) + 0.0730\*(MDEC22) + 0.4774\*(MDEC44) - 1.4600\*(BEHe3) - 1.0660\*(nR04) + 1.2755\*(MATS7m) + 0.7835\*(MATS6p) - 0.5908\*(GATS6e) + 0.3372\*(C=O(ketone, aliphatic attach)) + 0.9623\*(C=C(olefinic attach)) + 0.2454\*(C=O(O- [cyclic])) + 0.9909\*(CF3 [aliphatic attach]) - 3.4444

Descriptor Values

| Descriptor                     | Value   | Coefficient | Value × Coefficient |
|--------------------------------|---------|-------------|---------------------|
| xvch5                          | 0.0000  | 3.2600      | 0.00                |
| SdsCH                          | 0.0000  | -0.0849     | 0.00                |
| icycem                         | 0.7642  | 1.1841      | 0.90                |
| MDEC22                         | 0.0000  | 0.0730      | 0.00                |
| MDEC44                         | 0.0000  | 0.4774      | 0.00                |
| BEHe3                          | 3.6388  | 1.4600      | 5.31                |
| nR04                           | 0.0000  | -1.0660     | 0.00                |
| MATS7m                         | -0.1545 | 1.2755      | -0.20               |
| MATS6p                         | -0.0005 | 0.7835      | -0.00               |
| GATS6e                         | 0.9753  | -0.5908     | -0.58               |
| C=O(ketone, aliphatic attach)  | 0.0000  | 0.3372      | 0.00                |
| C=C(olefinic attach)           | 0.0000  | 0.9623      | 0.00                |
| C=O(O- [cyclic])               | 0.0000  | 0.2454      | 0.00                |
| CF3 [aliphatic attach]         | 0.0000  | 0.9909      | 0.00                |
| Model intercept                | 1.0000  | -3.4444     | -3.4444             |
| Predicted value -Log10(mol/kg) |         |             | 2.00                |

Model # 11750

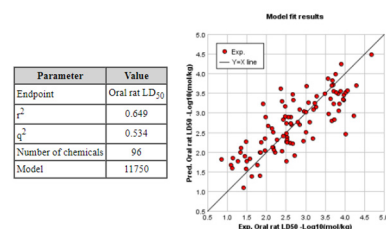

| Parameter           | Value                     |
|---------------------|---------------------------|
| Endpoint            | Oral rat LD <sub>50</sub> |
| r <sup>2</sup>      | 0.649                     |
| q <sup>2</sup>      | 0.534                     |
| Number of chemicals | 96                        |
| Model               | 11750                     |

| Coefficient                          | Definition                                                               | Value   | Uncertainty* |
|--------------------------------------|--------------------------------------------------------------------------|---------|--------------|
| xch3                                 | Simple 3rd order chain chi index                                         | 1.4717  | 1.1391       |
| xvch5                                | Valence 5th order chain chi index                                        | 7.6974  | 2.3423       |
| MDEC23                               | Molecular distance edge between all secondary and tertiary carbons       | 0.0546  | 0.0177       |
| MDEC44                               | Molecular distance edge between all quaternary carbons                   | 0.6888  | 0.4597       |
| MATS7m                               | Moran autocorrelation - lag 7 / weighted by atomic masses                | 0.9273  | 0.4300       |
| MATS6v                               | Moran autocorrelation - lag 6 / weighted by atomic van der Waals volumes | 0.9081  | 0.5911       |
| MATS4p                               | Moran autocorrelation - lag 4 / weighted by atomic polarizabilities      | 0.9733  | 0.7571       |
| -O- [2 aromatic attach]              | -O- [2 aromatic attach] fragment count                                   | 0.6503  | 0.3494       |
| C=O(O- [nitrogen, aliphatic attach]) | C=O(O- [nitrogen, aliphatic attach]) fragment count                      | -0.3292 | 0.2031       |
| C=O(O- [nitrogen attach])            | C=O(O- [nitrogen attach]) fragment count                                 | 0.9255  | 0.5557       |
| CF3 [aliphatic attach]               | CF3 [aliphatic attach] fragment count                                    | 0.8998  | 0.7123       |
| Model intercept                      | Intercept of multilinear regression model                                | 1.5446  | 0.3002       |

\* value for 90% confidence interval

Model equation:  
Oral rat LD<sub>50</sub> = 1.4717\*(xch3) + 7.6974\*(xvch5) + 0.0546\*(MDEC23) + 0.6888\*(MDEC44) + 0.9273\*(MATS7m) + 0.9081\*(MATS6v) + 0.9733\*(MATS4p) + 0.6503\*(-O- [2 aromatic attach]) - 0.3292\*(C=O(O- [nitrogen, aliphatic attach])) + 0.9255\*(C=O(O- [nitrogen attach])) + 0.8998\*(CF3 [aliphatic attach]) + 1.5446

Descriptor Values

| Descriptor                           | Value   | Coefficient | Value × Coefficient |
|--------------------------------------|---------|-------------|---------------------|
| xch3                                 | 0.0000  | 1.4717      | 0.00                |
| xvch5                                | 0.0000  | 7.6974      | 0.00                |
| MDEC23                               | 0.0000  | 0.0546      | 0.00                |
| MDEC44                               | 0.0000  | 0.6888      | 0.00                |
| MATS7m                               | -0.1545 | 0.9273      | -0.14               |
| MATS6v                               | -0.0002 | 0.9081      | -0.00               |
| MATS4p                               | -0.1539 | 0.9733      | -0.15               |
| -O- [2 aromatic attach]              | 0.0000  | 0.6503      | 0.00                |
| C=O(O- [nitrogen, aliphatic attach]) | 0.0000  | -0.3292     | 0.00                |
| C=O(O- [nitrogen attach])            | 0.0000  | 0.9255      | 0.00                |
| CF3 [aliphatic attach]               | 0.0000  | 0.8998      | 0.00                |
| Model intercept                      | 1.0000  | 1.5446      | 1.5446              |
| Predicted value -Log10(mol/kg)       |         |             | 1.25                |

## 2.4. Bioconcentration factor

### Prediction results

| Endpoint                      | Experimental value | Predicted value | Prediction interval               |
|-------------------------------|--------------------|-----------------|-----------------------------------|
| Bioconcentration factor Log10 | N/A                | 0.58            | $-0.67 \leq \text{Tox} \leq 1.84$ |
| Bioconcentration factor       | N/A                | 3.84            | $0.22 \leq \text{Tox} \leq 68.41$ |

### Cluster model predictions and statistics

| Cluster model | Test chemical descriptor values | Prediction interval Log10 | r <sup>2</sup> | q <sup>2</sup> | #chemicals | Applicability Domain |
|---------------|---------------------------------|---------------------------|----------------|----------------|------------|----------------------|
| 1079          | Descriptors                     | $0.58 \pm 1.25$           | 0.748          | 0.715          | 343        | OK                   |

Model # 1079

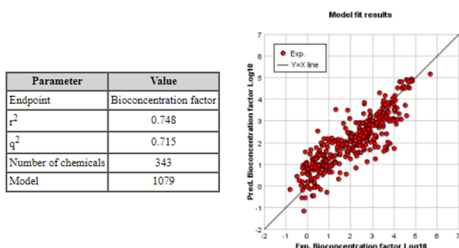

| Model coefficients          |                                                                                |         |                          |
|-----------------------------|--------------------------------------------------------------------------------|---------|--------------------------|
| Coefficient                 | Definition                                                                     | Value   | Uncertainty <sup>a</sup> |
| xvp10                       | Valence 10th order path chi index                                              | -0.9711 | 0.3808                   |
| SdO_acnt                    | Count of (=O) (SdO_acnt)                                                       | -0.3265 | 0.1339                   |
| SHsNH2                      | Sum of (I <sup>+</sup> NH2)) hydrogen E-States (SHsNH2)                        | -0.1621 | 0.1023                   |
| icycmm                      | Mean information on the vertex cycle matrix magnitude                          | 0.1450  | 0.0607                   |
| MDEC13                      | Molecular distance edge between all primary and tertiary carbons               | 0.0849  | 0.0301                   |
| MDEN22                      | Molecular distance edge between all secondary nitrogens                        | -0.2066 | 0.1099                   |
| BEHp2                       | Highest eigenvalue n. 2 of Burden matrix / weighted by atomic polarizabilities | 1.4370  | 0.3704                   |
| MAXDN                       | Maximal electrotopological negative variation                                  | 0.1665  | 0.0529                   |
| nDB                         | Number of double bonds                                                         | -0.2134 | 0.0990                   |
| MATS1v                      | Moran autocorrelation - lag 1 / weighted by atomic van der Waals volumes       | 1.1491  | 0.2153                   |
| GATS5v                      | Geary autocorrelation - lag 5 / weighted by atomic van der Waals volumes       | -0.3254 | 0.1647                   |
| GATS3p                      | Geary autocorrelation - lag 3 / weighted by atomic polarizabilities            | 0.5738  | 0.1874                   |
| Ui                          | unsaturation index                                                             | -0.3154 | 0.0875                   |
| -Cl [aromatic attach]       | -Cl [aromatic attach] fragment count                                           | 0.3098  | 0.0567                   |
| -C(=O)- [2 aromatic attach] | -C(=O)- [2 aromatic attach] fragment count                                     | 0.4964  | 0.2100                   |
| -COOH [aliphatic attach]    | -COOH [aliphatic attach] fragment count                                        | -0.6537 | 0.3452                   |
| Model intercept             | Intercept of multilinear regression model                                      | -3.1893 | 1.1938                   |

<sup>a</sup> value for 90% confidence interval

Model equation:  
 Bioconcentration factor =  $-0.9711 \times (\text{xvp10}) - 0.3265 \times (\text{SdO\_acnt}) - 0.1621 \times (\text{SHsNH2}) + 0.1450 \times (\text{icycmm}) + 0.0849 \times (\text{MDEC13}) - 0.2066 \times (\text{MDEN22}) + 1.4370 \times (\text{BEHp2}) + 0.1665 \times (\text{MAXDN}) - 0.2134 \times (\text{nDB}) + 1.1491 \times (\text{MATS1v}) - 0.3254 \times (\text{GATS5v}) + 0.5738 \times (\text{GATS3p}) - 0.3154 \times (\text{Ui}) + 0.3098 \times (\text{-Cl [aromatic attach]}) + 0.4964 \times (\text{-C(=O)- [2 aromatic attach]}) - 0.6537 \times (\text{-COOH [aliphatic attach]}) - 3.1893$

### Descriptor Values

| Descriptor                  | Value   | Coefficient | Value × Coefficient |
|-----------------------------|---------|-------------|---------------------|
| xvp10                       | 0.0958  | -0.9711     | -0.09               |
| SdO_acnt                    | 3.0000  | -0.3265     | -0.98               |
| SHsNH2                      | 0.0000  | -0.1621     | 0.00                |
| icycmm                      | 3.5850  | 0.1450      | 0.52                |
| MDEC13                      | 2.8783  | 0.0849      | 0.24                |
| MDEN22                      | 0.0000  | -0.2066     | 0.00                |
| BEHp2                       | 3.6289  | 1.4370      | 5.21                |
| MAXDN                       | 6.0447  | 0.1665      | 1.01                |
| nDB                         | 3.0000  | -0.2134     | -0.64               |
| MATS1v                      | -0.3091 | 1.1491      | -0.36               |
| GATS5v                      | 0.8656  | -0.3254     | -0.28               |
| GATS3p                      | 0.7358  | 0.5738      | 0.42                |
| Ui                          | 2.0000  | -0.3154     | -0.63               |
| -Cl [aromatic attach]       | 0.0000  | 0.3098      | 0.00                |
| -C(=O)- [2 aromatic attach] | 0.0000  | 0.4964      | 0.00                |
| -COOH [aliphatic attach]    | 1.0000  | -0.6537     | -0.65               |
| Model intercept             | 1.0000  | -3.1893     | -3.1893             |
| Predicted value Log10       |         |             | 0.58                |

## 2.5. Predicted Developmental Toxicity

### Prediction results

| Endpoint                      | Experimental value | Predicted value            |
|-------------------------------|--------------------|----------------------------|
| Developmental Toxicity value  | N/A                | 0.50                       |
| Developmental Toxicity result | N/A                | Developmental NON-toxicant |

### Cluster model predictions and statistics

| Cluster model       | Test chemical descriptor values | Predicted value | Concordance | Sensitivity | Specificity | #chemicals | Applicability Domain |
|---------------------|---------------------------------|-----------------|-------------|-------------|-------------|------------|----------------------|
| <a href="#">447</a> | <a href="#">Descriptors</a>     | 0.32            | 1.000       | 1.000       | 1.000       | 34         | OK                   |
| <a href="#">450</a> | <a href="#">Descriptors</a>     | 0.88            | 0.948       | 1.000       | 0.885       | 58         | OK                   |
| <a href="#">451</a> | <a href="#">Descriptors</a>     | 0.59            | 0.910       | 0.977       | 0.745       | 188        | OK                   |
| <a href="#">452</a> | <a href="#">Descriptors</a>     | 0.30            | 0.841       | 0.936       | 0.629       | 227        | OK                   |

#### Model # 447

| Parameter           | Value                  |
|---------------------|------------------------|
| Endpoint            | Developmental Toxicity |
| Concordance         | 1.000                  |
| Sensitivity         | 1.000                  |
| Specificity         | 1.000                  |
| Number of chemicals | 34                     |
| Model               | 447                    |

#### Model coefficients

| Coefficient            | Definition                                                               | Value   | Uncertainty* |
|------------------------|--------------------------------------------------------------------------|---------|--------------|
| MDEC33                 | Molecular distance edge between all tertiary carbons                     | 0.0249  | 0.0069       |
| MAT55m                 | Moran autocorrelation - lag 5 / weighted by atomic masses                | 1.3442  | 0.4887       |
| MAT56m                 | Moran autocorrelation - lag 6 / weighted by atomic masses                | 0.4615  | 0.3631       |
| MAT55p                 | Moran autocorrelation - lag 5 / weighted by atomic polarizabilities      | 0.6944  | 0.2663       |
| GAT33v                 | Geary autocorrelation - lag 3 / weighted by atomic van der Waals volumes | 0.8598  | 0.4367       |
| -NH- [aromatic attach] | -NH- [aromatic attach] fragment count                                    | 0.6840  | 0.2544       |
| Model intercept        | Intercept of multilinear regression model                                | -0.8745 | 0.3107       |

\* value for 90% confidence interval

#### Model equation:

Developmental Toxicity = 0.0249\*(MDEC33) + 1.3442\*(MAT55m) + 0.4615\*(MAT56m) + 0.6944\*(MAT55p) + 0.8598\*(GAT33v) + 0.6840\*(-NH- [aromatic attach]) - 0.8745

#### Descriptor Values

| Descriptor             | Value   | Coefficient | Value × Coefficient |
|------------------------|---------|-------------|---------------------|
| MDEC33                 | 17.6551 | 0.0249      | 0.44                |
| MAT55m                 | -0.0370 | 1.3442      | -0.05               |
| MAT56m                 | -0.0125 | 0.4615      | -0.01               |
| MAT55p                 | 0.0794  | 0.6944      | 0.06                |
| GAT33v                 | 0.8770  | 0.8598      | 0.75                |
| -NH- [aromatic attach] | 0.0000  | 0.6840      | 0.00                |
| Model intercept        | 1.0000  | -0.8745     | -0.8745             |
| Predicted value        |         |             | 0.32                |



# Model # 451

| Parameter           | Value                  |
|---------------------|------------------------|
| Endpoint            | Developmental Toxicity |
| Concordance         | 0.910                  |
| Sensitivity         | 0.977                  |
| Specificity         | 0.745                  |
| Number of chemicals | 188                    |
| Model               | 451                    |

## Model coefficients

| Coefficient                    | Definition                                                               | Value   | Uncertainty* |
|--------------------------------|--------------------------------------------------------------------------|---------|--------------|
| xvch7                          | Valence 7th order chain chi index                                        | 5.9616  | 4.8767       |
| SHsOH                          | Sum of (I <sup>o</sup> OH) hydrogen E-States (SHsOH)                     | -0.0302 | 0.0165       |
| Hmax                           | Maximum hydrogen E-State value in molecule.                              | 0.1807  | 0.1141       |
| ic                             | Information content                                                      | -0.0096 | 0.0067       |
| icycem                         | Mean information on the vertex cycle matrix equality                     | 0.4907  | 0.2325       |
| MDEN33                         | Molecular distance edge between all tertiary nitrogens                   | 0.4846  | 0.2882       |
| MATS2p                         | Moran autocorrelation - lag 2 / weighted by atomic polarizabilities      | 0.4541  | 0.2440       |
| GATS1v                         | Geary autocorrelation - lag 1 / weighted by atomic van der Waals volumes | -0.3367 | 0.2083       |
| GATS4p                         | Geary autocorrelation - lag 4 / weighted by atomic polarizabilities      | -0.2506 | 0.1330       |
| -CH3 [aromatic attach]         | -CH3 [aromatic attach] fragment count                                    | -0.1317 | 0.0915       |
| -CH= [aromatic attach]         | -CH= [aromatic attach] fragment count                                    | -0.4264 | 0.2350       |
| >C= [aromatic attach]          | >C= [aromatic attach] fragment count                                     | 0.1666  | 0.1110       |
| AC                             | AC fragment count                                                        | 0.0304  | 0.0209       |
| -NH2 [aliphatic attach]        | -NH2 [aliphatic attach] fragment count                                   | 0.1766  | 0.0731       |
| -S- [aliphatic attach]         | -S- [aliphatic attach] fragment count                                    | -0.8136 | 0.1543       |
| -S(=O)(=O)- [aliphatic attach] | -S(=O)(=O)- [aliphatic attach] fragment count                            | 0.5328  | 0.2531       |
| Model intercept                | Intercept of multilinear regression model                                | 0.4765  | 0.4643       |

\* value for 90% confidence interval

## Model equation:

Developmental Toxicity = 5.9616\*(xvch7) - 0.0302\*(SHsOH) + 0.1807\*(Hmax) - 0.0096\*(ic) + 0.4907\*(icycem) + 0.4846\*(MDEN33) + 0.4541\*(MATS2p) - 0.3367\*(GATS1v) - 0.2506\*(GATS4p) - 0.1317\*(-CH3 [aromatic attach]) - 0.4264\*(-CH= [aromatic attach]) + 0.1666\*(>C= [aromatic attach]) + 0.0304\*(AC) + 0.1766\*(-NH2 [aliphatic attach]) - 0.8136\*(-S- [aliphatic attach]) + 0.5328\*(-S(=O)(=O)- [aliphatic attach]) + 0.4765

## Descriptor Values

| Descriptor                     | Value   | Coefficient | Value × Coefficient |
|--------------------------------|---------|-------------|---------------------|
| xvch7                          | 0.0000  | 5.9616      | 0.00                |
| SHsOH                          | 19.9085 | -0.0302     | -0.60               |
| Hmax                           | 3.0165  | 0.1807      | 0.55                |
| ic                             | 2.0000  | -0.0096     | -0.02               |
| icycem                         | 0.7642  | 0.4907      | 0.38                |
| MDEN33                         | 0.0000  | 0.4846      | 0.00                |
| MATS2p                         | 0.0178  | 0.4541      | 0.01                |
| GATS1v                         | 1.3059  | -0.3367     | -0.44               |
| GATS4p                         | 1.1577  | -0.2506     | -0.29               |
| -CH3 [aromatic attach]         | 0.0000  | -0.1317     | 0.00                |
| -CH= [aromatic attach]         | 0.0000  | -0.4264     | 0.00                |
| >C= [aromatic attach]          | 0.0000  | 0.1666      | 0.00                |
| AC                             | 0.0000  | 0.0304      | 0.00                |
| -NH2 [aliphatic attach]        | 0.0000  | 0.1766      | 0.00                |
| -S- [aliphatic attach]         | 0.0000  | -0.8136     | 0.00                |
| -S(=O)(=O)- [aliphatic attach] | 1.0000  | 0.5328      | 0.53                |
| Model intercept                | 1.0000  | 0.4765      | 0.4765              |
| Predicted value                |         |             | 0.59                |

# Model # 452

| Parameter           | Value                  |
|---------------------|------------------------|
| Endpoint            | Developmental Toxicity |
| Concordance         | 0.841                  |
| Sensitivity         | 0.936                  |
| Specificity         | 0.629                  |
| Number of chemicals | 227                    |
| Model               | 452                    |

## Model coefficients

| Coefficient            | Definition                                                               | Value   | Uncertainty* |
|------------------------|--------------------------------------------------------------------------|---------|--------------|
| xvch9                  | Valence 9th order chain chi index                                        | 14.8609 | 12.2997      |
| SsaaN                  | Sum of (saaN) E-States (SsaaN)                                           | -0.1686 | 0.1540       |
| SHsOH                  | Sum of (I <sup>o</sup> OH) hydrogen E-States (SHsOH)                     | -0.0365 | 0.0165       |
| Hmax                   | Maximum hydrogen E-State value in molecule.                              | 0.2196  | 0.0975       |
| ib                     | Information bond index                                                   | 0.0101  | 0.0043       |
| MDEN11                 | Molecular distance edge between all primary nitrogens                    | 0.6064  | 0.2997       |
| MDEN33                 | Molecular distance edge between all tertiary nitrogens                   | 0.4425  | 0.2566       |
| BEHm1                  | Highest eigenvalue n. 1 of Burden matrix / weighted by atomic masses     | 0.0300  | 0.0296       |
| ARR                    | Aromatic ratio                                                           | -0.3353 | 0.2102       |
| MATS3v                 | Moran autocorrelation - lag 3 / weighted by atomic van der Waals volumes | -0.2669 | 0.1766       |
| GATS2p                 | Geary autocorrelation - lag 2 / weighted by atomic polarizabilities      | -0.3290 | 0.2014       |
| GATS5p                 | Geary autocorrelation - lag 5 / weighted by atomic polarizabilities      | -0.1879 | 0.0981       |
| -S- [aliphatic attach] | -S- [aliphatic attach] fragment count                                    | -0.8749 | 0.1549       |
| Model intercept        | Intercept of multilinear regression model                                | 0.5360  | 0.2801       |

\* value for 90% confidence interval

## Model equation:

Developmental Toxicity = 14.8609\*(xvch9) - 0.1686\*(SsaaN) - 0.0365\*(SHsOH) + 0.2196\*(Hmax) + 0.0101\*(ib) + 0.6064\*(MDEN11) + 0.4425\*(MDEN33) + 0.0300\*(BEHm1) - 0.3353\*(ARR) - 0.2669\*(MATS3v) - 0.3290\*(GATS2p) - 0.1879\*(GATS5p) - 0.8749\*(-S- [aliphatic attach]) + 0.5360

## Descriptor Values

| Descriptor             | Value   | Coefficient | Value × Coefficient |
|------------------------|---------|-------------|---------------------|
| xvch9                  | 0.0000  | 14.8609     | 0.00                |
| SsaaN                  | 0.0000  | -0.1686     | 0.00                |
| SHsOH                  | 19.9085 | -0.0365     | -0.73               |
| Hmax                   | 3.0165  | 0.2196      | 0.66                |
| ib                     | 13.7546 | 0.0101      | 0.14                |
| MDEN11                 | 0.0000  | 0.6064      | 0.00                |
| MDEN33                 | 0.0000  | 0.4425      | 0.00                |
| BEHm1                  | 4.5841  | 0.0300      | 0.14                |
| ARR                    | 0.0000  | -0.3353     | 0.00                |
| MATS3v                 | 0.0787  | -0.2669     | -0.02               |
| GATS2p                 | 0.7586  | -0.3290     | -0.25               |
| GATS5p                 | 0.9410  | -0.1879     | -0.18               |
| -S- [aliphatic attach] | 0.0000  | -0.8749     | 0.00                |
| Model intercept        | 1.0000  | 0.5360      | 0.5360              |
| Predicted value        |         |             | 0.30                |

## 2.6. Predicted Mutagenicity

| Prediction results  |                    |                              |
|---------------------|--------------------|------------------------------|
| Endpoint            | Experimental value | Predicted value <sup>b</sup> |
| Mutagenicity value  | N/A                | N/A                          |
| Mutagenicity result | N/A                | N/A                          |

<sup>b</sup>A prediction cannot be made

No statistically valid models were selected by the hierarchical clustering algorithm for this compound

Cluster models with applicability domain violation

| Cluster model        | Test chemical descriptor values | Predicted value | Concordance | Sensitivity | Specificity | #chemicals | Applicability Domain               |
|----------------------|---------------------------------|-----------------|-------------|-------------|-------------|------------|------------------------------------|
| <a href="#">8727</a> | <a href="#">Descriptors</a>     | -0.08           | 1.000       | 1.000       | 1.000       | 5          | Rmax constraint not met            |
| <a href="#">8492</a> | <a href="#">Descriptors</a>     | 1.76            | 0.947       | 0.857       | 1.000       | 19         | Rmax constraint not met            |
| <a href="#">8928</a> | <a href="#">Descriptors</a>     | 0.08            | 0.972       | 1.000       | 0.933       | 36         | Rmax constraint not met            |
| <a href="#">9071</a> | <a href="#">Descriptors</a>     | 0.48            | 0.965       | 0.833       | 1.000       | 86         | Model ellipsoid constraint not met |

[Descriptor values for test chemical](#)

## 3. Typical valid model predictions and statistics for B3s structure:

### 3.1. Predicted Fathead minnow LC<sub>50</sub> (96 hr)

| Prediction results                                    |                    |                              |
|-------------------------------------------------------|--------------------|------------------------------|
| Endpoint                                              | Experimental value | Predicted value <sup>b</sup> |
| Fathead minnow LC <sub>50</sub> (96 hr) -Log10(mol/L) | N/A                | N/A                          |
| Fathead minnow LC <sub>50</sub> (96 hr) mg/L          | N/A                | N/A                          |

<sup>b</sup>No prediction could be made

| Individual Predictions  |                               |
|-------------------------|-------------------------------|
| Method                  | Predicted value -Log10(mol/L) |
| Hierarchical clustering | <a href="#">N/A</a>           |
| Single model            | <a href="#">N/A</a>           |
| Group contribution      | <a href="#">N/A</a>           |
| Nearest neighbor        | <a href="#">N/A</a>           |

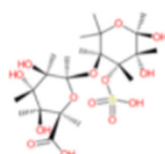

### 3.2. Predicted Daphnia magna LC<sub>50</sub> (48 hr)

### Prediction results

| Endpoint                                             | Experimental value | Predicted value |
|------------------------------------------------------|--------------------|-----------------|
| Daphnia magna LC <sub>50</sub> (48 hr) -Log10(mol/L) | N/A                | 3.12            |
| Daphnia magna LC <sub>50</sub> (48 hr) mg/L          | N/A                | 421.04          |

### Cluster model predictions and statistics

| Cluster model       | Test chemical descriptor values | Prediction interval -Log10(mol/L) | r <sup>2</sup> | q <sup>2</sup> | #chemicals | Applicability Domain |
|---------------------|---------------------------------|-----------------------------------|----------------|----------------|------------|----------------------|
| <a href="#">854</a> | <a href="#">Descriptors</a>     | 4.73 ± 1.30                       | 0.725          | 0.571          | 7          | OK                   |
| <a href="#">862</a> | <a href="#">Descriptors</a>     | 1.69 ± 1.60                       | 0.707          | 0.656          | 432        | OK                   |

#### Model # 854

| Parameter           | Value                                  |
|---------------------|----------------------------------------|
| Endpoint            | Daphnia magna LC <sub>50</sub> (48 hr) |
| r <sup>2</sup>      | 0.725                                  |
| q <sup>2</sup>      | 0.571                                  |
| Number of chemicals | 7                                      |
| Model               | 854                                    |

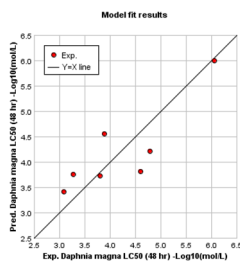

#### Descriptor Values

| Descriptor                    | Value   | Coefficient | Value × Coefficient |
|-------------------------------|---------|-------------|---------------------|
| MWC09                         | 12.3758 | 2.1019      | 26.01               |
| Model intercept               | 1.0000  | -21.2846    | -21.2846            |
| Predicted value -Log10(mol/L) |         |             | 4.73                |

#### Model coefficients

| Coefficient     | Definition                                | Value    | Uncertainty* |
|-----------------|-------------------------------------------|----------|--------------|
| MWC09           | Molecular walk count of order 9           | 2.1019   | 1.1676       |
| Model intercept | Intercept of multilinear regression model | -21.2846 | 14.1706      |

\* value for 90% confidence interval

Model equation:  
Daphnia magna LC50 (48 hr) = 2.1019\*(MWC09) - 21.2846

Model # 862

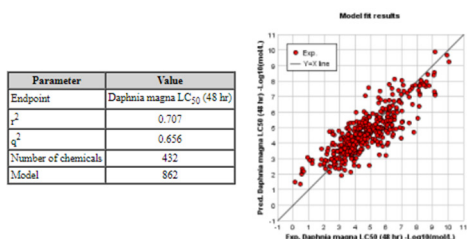

| Parameter           | Value                                  |
|---------------------|----------------------------------------|
| Endpoint            | Daphnia magna LC <sub>50</sub> (48 hr) |
| r <sup>2</sup>      | 0.707                                  |
| q <sup>2</sup>      | 0.656                                  |
| Number of chemicals | 432                                    |
| Model               | 862                                    |

| Coefficient                 | Definition                                                                                            | Value   | Uncertainty <sup>a</sup> |
|-----------------------------|-------------------------------------------------------------------------------------------------------|---------|--------------------------|
| SssCH2                      | Sum of ( ? CH2 ? ) E-States (SssCH2)                                                                  | -0.1098 | 0.0302                   |
| SddC                        | Sum of ( = C = ) E-States (SddC)                                                                      | 0.5315  | 0.2260                   |
| SnN                         | Sum of ( nN ) E-States (SnN)                                                                          | 0.1020  | 0.0418                   |
| SsNH2_acnt                  | Count of ( ? NH2 ) (SsNH2_acnt)                                                                       | 0.7574  | 0.2171                   |
| SdssP_acnt                  | Count of ( ssP ) (SdssP_acnt)                                                                         | 1.0683  | 0.6658                   |
| SaaS_acnt                   | Count of ( aaS ) (SaaS_acnt)                                                                          | -0.9442 | 0.4854                   |
| Qsv                         | Average of Qs and Qv                                                                                  | 0.6629  | 0.3714                   |
| MDEN12                      | Molecular distance edge between all primary and secondary nitrogens                                   | -0.3705 | 0.3269                   |
| BEHm1                       | Highest eigenvalue n. 1 of Burden matrix / weighted by atomic masses                                  | 0.3299  | 0.1476                   |
| TIE                         | E-state topological parameter                                                                         | -0.0008 | 0.0008                   |
| ATS5p                       | Broto-Moreau autocorrelation of a topological structure - lag 5 / weighted by atomic polarizabilities | 0.1089  | 0.0820                   |
| MATS6m                      | Moran autocorrelation - lag 6 / weighted by atomic masses                                             | -0.2993 | 0.2428                   |
| MATS4v                      | Moran autocorrelation - lag 4 / weighted by atomic van der Waals volumes                              | -0.2083 | 0.1938                   |
| MATS6v                      | Moran autocorrelation - lag 6 / weighted by atomic van der Waals volumes                              | 0.5849  | 0.2437                   |
| MATS8v                      | Moran autocorrelation - lag 8 / weighted by atomic van der Waals volumes                              | 0.4000  | 0.2639                   |
| GATS1p                      | Geary autocorrelation - lag 1 / weighted by atomic polarizabilities                                   | -0.3492 | 0.2344                   |
| GATS3p                      | Geary autocorrelation - lag 3 / weighted by atomic polarizabilities                                   | 0.3034  | 0.1682                   |
| SRW07                       | Self-returning walk count of order 7                                                                  | 0.0014  | 0.0006                   |
| ALOGP                       | Giuse-Crippen octanol water coefficient                                                               | 0.5107  | 0.0592                   |
| =C [aliphatic attach]       | =C [aliphatic attach] fragment count                                                                  | 0.3600  | 0.1521                   |
| -O- [phosphorus attach]     | -O- [phosphorus attach] fragment count                                                                | 0.8688  | 0.3389                   |
| -OH [aromatic attach]       | -OH [aromatic attach] fragment count                                                                  | 0.2668  | 0.2267                   |
| -CH=N                       | -CH=N fragment count                                                                                  | 1.0449  | 0.6211                   |
| -C(=O)O- [aliphatic attach] | -C(=O)O- [aliphatic attach] fragment count                                                            | 0.4000  | 0.2854                   |
| -C(=O)O- [nitrogen attach]  | -C(=O)O- [nitrogen attach] fragment count                                                             | 0.9850  | 0.4133                   |
| -CCl3 [aliphatic attach]    | -CCl3 [aliphatic attach] fragment count                                                               | 0.7305  | 0.5572                   |
| Model intercept             | Intercept of multilinear regression model                                                             | 0.9039  | 0.6882                   |

<sup>a</sup> value for 90% confidence interval

Model equation:  
Daphnia magna LC<sub>50</sub> (48 hr) = -0.1098\*(SssCH2) + 0.5315\*(SddC) + 0.1020\*(SnN) + 0.7574\*(SsNH2\_acnt) + 1.0683\*(SdssP\_acnt) - 0.9442\*(SaaS\_acnt) + 0.6629\*(Qsv) - 0.3705\*(MDEN12) + 0.3299\*(BEHm1) - 0.0008\*(TIE) + 0.1089\*(ATS5p) - 0.2993\*(MATS6m) - 0.2083\*(MATS4v) + 0.5849\*(MATS6v) - 0.4000\*(MATS8v) - 0.3492\*(GATS1p) + 0.3034\*(GATS3p) + 0.0014\*(SRW07) + 0.5107\*(ALOGP) + 0.3600\*(=C [aliphatic attach]) + 0.8688\*(-O- [phosphorus attach]) + 0.2668\*(-OH [aromatic attach]) + 1.0449\*(-CH=N) + 0.4000\*(-C(=O)O- [aliphatic attach]) + 0.9850\*(-C(=O)O- [nitrogen attach]) + 0.7305\*(-CCl3 [aliphatic attach]) + 0.9039

Descriptor Values

| Descriptor                    | Value    | Coefficient | Value × Coefficient |
|-------------------------------|----------|-------------|---------------------|
| SssCH2                        | 0.0000   | -0.1098     | 0.00                |
| SddC                          | 0.0000   | 0.5315      | 0.00                |
| SnN                           | 0.0000   | 0.1020      | 0.00                |
| SsNH2_acnt                    | 0.0000   | 0.7574      | 0.00                |
| SdssP_acnt                    | 0.0000   | 1.0683      | 0.00                |
| SaaS_acnt                     | 0.0000   | -0.9442     | 0.00                |
| Qsv                           | 0.6321   | 0.6629      | 0.42                |
| MDEN12                        | 0.0000   | -0.3705     | 0.00                |
| BEHm1                         | 4.6267   | 0.3299      | 1.53                |
| TIE                           | 268.6655 | -0.0008     | -0.23               |
| ATS5p                         | 4.0726   | 0.1089      | 0.44                |
| MATS6m                        | -0.0105  | -0.2993     | 0.00                |
| MATS4v                        | -0.1053  | -0.2083     | 0.02                |
| MATS6v                        | 0.0200   | 0.5849      | 0.01                |
| MATS8v                        | -0.0542  | 0.4000      | -0.02               |
| GATS1p                        | 1.4306   | -0.3492     | -0.50               |
| GATS3p                        | 0.7899   | 0.3034      | 0.24                |
| SRW07                         | 0.0000   | 0.0014      | 0.00                |
| ALOGP                         | -2.2243  | 0.5107      | -1.14               |
| =C [aliphatic attach]         | 0.0000   | 0.3600      | 0.00                |
| -O- [phosphorus attach]       | 0.0000   | 0.8688      | 0.00                |
| -OH [aromatic attach]         | 0.0000   | 0.2668      | 0.00                |
| -CH=N                         | 0.0000   | 1.0449      | 0.00                |
| -C(=O)O- [aliphatic attach]   | 0.0000   | 0.4000      | 0.00                |
| -C(=O)O- [nitrogen attach]    | 0.0000   | 0.9850      | 0.00                |
| -CCl3 [aliphatic attach]      | 0.0000   | 0.7305      | 0.00                |
| Model intercept               | 1.0000   | 0.9039      | 0.9039              |
| Predicted value -Log10(mol/L) |          |             | 1.69                |

### 3.3. Predicted *T. pyriformis* IGC<sub>50</sub> (48 hr)

| Prediction results                                           |                    |                              |                     |
|--------------------------------------------------------------|--------------------|------------------------------|---------------------|
| Endpoint                                                     | Experimental value | Predicted value <sup>b</sup> | Prediction interval |
| <i>T. pyriformis</i> IGC <sub>50</sub> (48 hr) -Log10(mol/L) | N/A                | N/A                          | N/A                 |
| <i>T. pyriformis</i> IGC <sub>50</sub> (48 hr) mg/L          | N/A                | N/A                          | N/A                 |

<sup>b</sup> A prediction cannot be made

### 3.4. Predicted Oral rat LD<sub>50</sub>



Prediction results

| Endpoint                                 | Experimental value | Predicted value <sup>b</sup> | Prediction interval |
|------------------------------------------|--------------------|------------------------------|---------------------|
| Oral rat LD <sub>50</sub> -Log10(mol/kg) | N/A                | N/A                          | N/A                 |
| Oral rat LD <sub>50</sub> mg/kg          | N/A                | N/A                          | N/A                 |

<sup>b</sup>A prediction cannot be made

### 3.5. Predicted Bioconcentration factor

Prediction results

| Endpoint                      | Experimental value | Predicted value |
|-------------------------------|--------------------|-----------------|
| Bioconcentration factor Log10 | N/A                | 0.39            |
| Bioconcentration factor       | N/A                | 2.44            |

Cluster model predictions and statistics

| Cluster model        | Test chemical descriptor values | Prediction interval Log10 | r <sup>2</sup> | q <sup>2</sup> | #chemicals | Applicability Domain |
|----------------------|---------------------------------|---------------------------|----------------|----------------|------------|----------------------|
| <a href="#">1079</a> | <a href="#">Descriptors</a>     | 0.91 ± 1.25               | 0.748          | 0.715          | 343        | OK                   |
| <a href="#">1080</a> | <a href="#">Descriptors</a>     | -0.18 ± 1.33              | 0.764          | 0.733          | 540        | OK                   |

Model # 1079

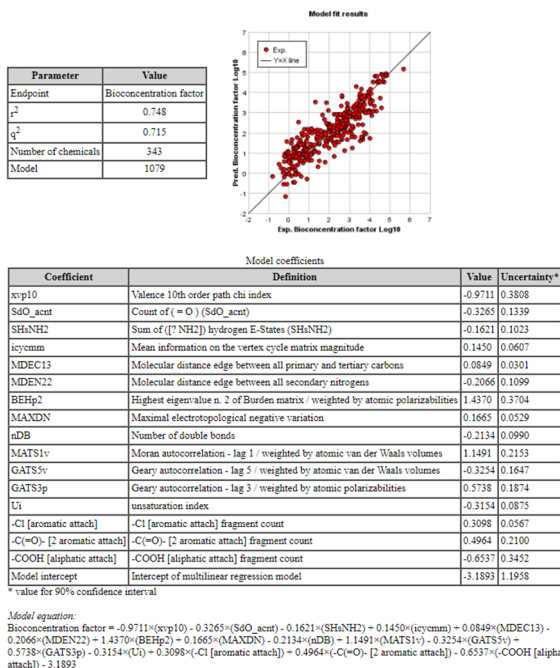

Descriptor Values

| Descriptor                  | Value   | Coefficient | Value × Coefficient |
|-----------------------------|---------|-------------|---------------------|
| xvp10                       | 0.0991  | -0.9711     | -0.10               |
| SdO_acnt                    | 3.0000  | -0.3265     | -0.98               |
| SHsNH2                      | 0.0000  | -0.1621     | 0.00                |
| icymm                       | 3.5850  | 0.1450      | 0.52                |
| MDEC13                      | 2.1260  | 0.0849      | 0.18                |
| MDEN22                      | 0.0000  | -0.2066     | 0.00                |
| BEHp2                       | 3.7879  | 1.4370      | 5.44                |
| MAXDN                       | 6.3019  | 0.1665      | 1.05                |
| nDB                         | 3.0000  | -0.2134     | -0.64               |
| MATS1v                      | -0.2058 | 1.1491      | -0.24               |
| GATS5v                      | 0.9665  | -0.3254     | -0.31               |
| GATS3p                      | 0.7899  | 0.5738      | 0.45                |
| U1                          | 2.0000  | -0.3154     | -0.63               |
| -Cl [aromatic attach]       | 0.0000  | 0.3098      | 0.00                |
| -C(=O)- [2 aromatic attach] | 0.0000  | 0.4964      | 0.00                |
| -COOH [aliphatic attach]    | 1.0000  | -0.6537     | -0.65               |
| Model intercept             | 1.0000  | -3.1893     | -3.1893             |
| Predicted value Log10       |         |             | 0.91                |

Model # 1080

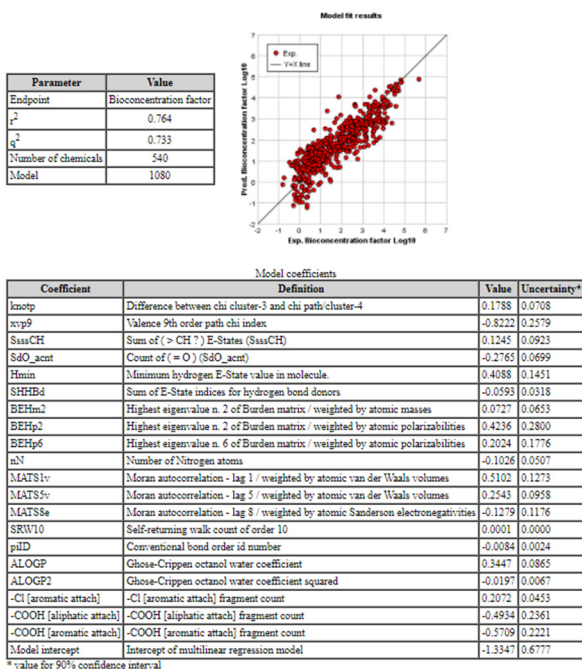

**Model equation:**  

$$\text{Bioconcentration factor} = 0.1788 \cdot (\text{knotp}) - 0.8222 \cdot (\text{xvp9}) + 0.1245 \cdot (\text{SsssCH}) - 0.2765 \cdot (\text{SdO\_acnt}) + 0.4088 \cdot (\text{Hmin}) - 0.0593 \cdot (\text{SHHBd}) + 0.0727 \cdot (\text{BEHm2}) + 0.4236 \cdot (\text{BEHp2}) + 0.2024 \cdot (\text{BEHp6}) - 0.1026 \cdot (\text{nN}) + 0.5102 \cdot (\text{MATS1v}) + 0.2543 \cdot (\text{MATS5v}) - 0.1279 \cdot (\text{MATS8e}) + 0.0001 \cdot (\text{SRW10}) - 0.0084 \cdot (\text{piID}) + 0.3447 \cdot (\text{ALOGP}) - 0.0197 \cdot (\text{ALOGP2}) + 0.2072 \cdot (\text{-Cl [aromatic attach]}) - 0.4934 \cdot (\text{-COOH [aliphatic attach]}) - 0.5709 \cdot (\text{-COOH [aromatic attach]}) - 1.3347$$

| Descriptor Values        |            |             |                     |
|--------------------------|------------|-------------|---------------------|
| Descriptor               | Value      | Coefficient | Value × Coefficient |
| knotp                    | -13.4132   | 0.1788      | -2.40               |
| xvp9                     | 0.2310     | -0.8222     | -0.19               |
| SsssCH                   | 0.0000     | 0.1245      | 0.00                |
| SdO_acnt                 | 3.0000     | -0.2765     | -0.83               |
| Hmin                     | 0.9689     | 0.4088      | 0.40                |
| SHHBd                    | 20.3675    | -0.0593     | -1.21               |
| BEHm2                    | 4.0255     | 0.0727      | 0.29                |
| BEHp2                    | 3.7879     | 0.4236      | 1.60                |
| BEHp6                    | 3.1622     | 0.2024      | 0.64                |
| nN                       | 0.0000     | -0.1026     | 0.00                |
| MATS1v                   | -0.2058    | 0.5102      | -0.10               |
| MATS5v                   | 0.0260     | 0.2543      | 0.01                |
| MATS8e                   | -0.0867    | -0.1279     | 0.01                |
| SRW10                    | 90626.0000 | 0.0001      | 5.23                |
| piID                     | 112.1908   | -0.0084     | -0.94               |
| ALOGP                    | -2.2243    | 0.3447      | -0.77               |
| ALOGP2                   | 4.9475     | -0.0197     | -0.10               |
| -Cl [aromatic attach]    | 0.0000     | 0.2072      | 0.00                |
| -COOH [aliphatic attach] | 1.0000     | -0.4934     | -0.49               |
| -COOH [aromatic attach]  | 0.0000     | -0.5709     | 0.00                |
| Model intercept          | 1.0000     | -1.3347     | -1.3347             |
| Predicted value Log10    |            |             | -0.18               |

### 3.6. Developmental Toxicity

| Prediction results            |                    |                              |
|-------------------------------|--------------------|------------------------------|
| Endpoint                      | Experimental value | Predicted value <sup>b</sup> |
| Developmental Toxicity value  | N/A                | N/A                          |
| Developmental Toxicity result | N/A                | N/A                          |

<sup>b</sup>No prediction could be made

### 3.7. Predicted Mutagenicity

# Prediction results

| Endpoint            | Experimental value | Predicted value       |
|---------------------|--------------------|-----------------------|
| Mutagenicity value  | N/A                | 0.32                  |
| Mutagenicity result | N/A                | Mutagenicity Negative |

## Cluster model predictions and statistics

| Cluster model        | Test chemical descriptor values | Predicted value | Concordance | Sensitivity | Specificity | #chemicals | Applicability Domain |
|----------------------|---------------------------------|-----------------|-------------|-------------|-------------|------------|----------------------|
| <a href="#">9156</a> | <a href="#">Descriptors</a>     | 0.35            | 0.916       | 0.763       | 1.000       | 107        | OK                   |
| <a href="#">9160</a> | <a href="#">Descriptors</a>     | 0.43            | 0.899       | 0.737       | 0.986       | 109        | OK                   |
| <a href="#">9184</a> | <a href="#">Descriptors</a>     | 0.19            | 0.908       | 0.804       | 0.958       | 142        | OK                   |

## Cluster models with applicability domain violation

| Cluster model        | Test chemical descriptor values | Predicted value | Concordance | Sensitivity | Specificity | #chemicals | Applicability Domain               |
|----------------------|---------------------------------|-----------------|-------------|-------------|-------------|------------|------------------------------------|
| <a href="#">8954</a> | <a href="#">Descriptors</a>     | 0.57            | 1.000       | 1.000       | 1.000       | 10         | Rmax constraint not met            |
| <a href="#">8989</a> | <a href="#">Descriptors</a>     | -0.60           | 1.000       | 1.000       | 1.000       | 16         | Rmax constraint not met            |
| <a href="#">9179</a> | <a href="#">Descriptors</a>     | -1.32           | 0.920       | 0.786       | 0.979       | 137        | Model ellipsoid constraint not met |

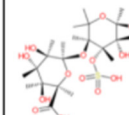

### Model # 9156

| Parameter           | Value        |
|---------------------|--------------|
| Endpoint            | Mutagenicity |
| Concordance         | 0.916        |
| Sensitivity         | 0.763        |
| Specificity         | 1.000        |
| Number of chemicals | 107          |
| Model               | 9156         |

| Coefficient                 | Definition                                                                    | Value   | Uncertainty* |
|-----------------------------|-------------------------------------------------------------------------------|---------|--------------|
| SaaaC_acnt                  | Count of ( aac ) (SaaaC_acnt)                                                 | -0.1078 | 0.0330       |
| numwHBd                     | Number of weak hydrogen bond donors (i.e. -CHX, where X = Cl,F)               | 0.1975  | 0.1206       |
| BELm4                       | Lowest eigenvalue n. 4 of Burden matrix / weighted by atomic masses           | -2.0214 | 0.6078       |
| BELp3                       | Lowest eigenvalue n. 3 of Burden matrix / weighted by atomic polarizabilities | 1.2901  | 0.9658       |
| nR10                        | Number of 10-membered rings                                                   | 0.0578  | 0.0425       |
| GATS7v                      | Geary autocorrelation - lag 7 / weighted by atomic van der Waals volumes      | -0.2141 | 0.1533       |
| -CH< [aromatic attach]      | -CH< [aromatic attach] fragment count                                         | 0.1091  | 0.1038       |
| =C [aliphatic attach]       | =C [aliphatic attach] fragment count                                          | -0.0784 | 0.0653       |
| -F [aliphatic attach]       | -F [aliphatic attach] fragment count                                          | -0.3145 | 0.2412       |
| -O- [oxygen attach]         | -O- [oxygen attach] fragment count                                            | 0.9290  | 0.3735       |
| -O- [2 aromatic attach]     | -O- [2 aromatic attach] fragment count                                        | 0.2546  | 0.1810       |
| -NH- [nitrogen attach]      | -NH- [nitrogen attach] fragment count                                         | 0.4193  | 0.2373       |
| -C(=O)- [2 aromatic attach] | -C(=O)- [2 aromatic attach] fragment count                                    | 0.1072  | 0.0622       |
| -C(=O)O- [cyclic]           | -C(=O)O- [cyclic] fragment count                                              | -0.3766 | 0.3117       |
| Model intercept             | Intercept of multilinear regression model                                     | 1.5339  | 1.4093       |

\* value for 90% confidence interval

Model equation:  
Mutagenicity = -0.1078\*(SaaaC\_acnt) + 0.1975\*(numwHBd) - 2.0214\*(BELm4) + 1.2901\*(BELp3) + 0.0578\*(nR10) - 0.2141\*(GATS7v) + 0.1091\*(-CH< [aromatic attach]) - 0.0784\*(=C [aliphatic attach]) - 0.3145\*(-F [aliphatic attach]) + 0.9290\*(-O- [oxygen attach]) + 0.2546\*(-O- [2 aromatic attach]) + 0.4193\*(-NH- [nitrogen attach]) + 0.1072\*(-C(=O)- [2 aromatic attach]) - 0.3766\*(-C(=O)O- [cyclic]) + 1.5339

### Descriptor Values

| Descriptor                  | Value  | Coefficient | Value × Coefficient |
|-----------------------------|--------|-------------|---------------------|
| SaaaC_acnt                  | 0.0000 | -0.1078     | 0.00                |
| numwHBd                     | 0.0000 | 0.1975      | 0.00                |
| BELm4                       | 1.6503 | -2.0214     | -3.34               |
| BELp3                       | 1.8351 | 1.2901      | 2.37                |
| nR10                        | 0.0000 | 0.0578      | 0.00                |
| GATS7v                      | 1.0143 | -0.2141     | -0.22               |
| -CH< [aromatic attach]      | 0.0000 | 0.1091      | 0.00                |
| =C [aliphatic attach]       | 0.0000 | -0.0784     | 0.00                |
| -F [aliphatic attach]       | 0.0000 | -0.3145     | 0.00                |
| -O- [oxygen attach]         | 0.0000 | 0.9290      | 0.00                |
| -O- [2 aromatic attach]     | 0.0000 | 0.2546      | 0.00                |
| -NH- [nitrogen attach]      | 0.0000 | 0.4193      | 0.00                |
| -C(=O)- [2 aromatic attach] | 0.0000 | 0.1072      | 0.00                |
| -C(=O)O- [cyclic]           | 0.0000 | -0.3766     | 0.00                |
| Model intercept             | 1.0000 | 1.5339      | 1.5339              |
| Predicted value             |        |             | 0.35                |

### Model # 9160

| Parameter           | Value        |
|---------------------|--------------|
| Endpoint            | Mutagenicity |
| Concordance         | 0.899        |
| Sensitivity         | 0.737        |
| Specificity         | 0.986        |
| Number of chemicals | 109          |
| Model               | 9160         |

| Coefficient                 | Definition                                                                    | Value   | Uncertainty* |
|-----------------------------|-------------------------------------------------------------------------------|---------|--------------|
| SdssC_acnt                  | Count of ( = C < ) (SdssC_acnt)                                               | -0.0338 | 0.0306       |
| SaaaC_acnt                  | Count of ( aac ) (SaaaC_acnt)                                                 | -0.1628 | 0.0387       |
| MDEC23                      | Molecular distance edge between all secondary and tertiary carbons            | 0.0169  | 0.0068       |
| MDEN23                      | Molecular distance edge between all secondary and tertiary nitrogens          | 0.2630  | 0.2122       |
| BELm4                       | Lowest eigenvalue n. 4 of Burden matrix / weighted by atomic masses           | -1.0218 | 0.4695       |
| BELp1                       | Lowest eigenvalue n. 1 of Burden matrix / weighted by atomic polarizabilities | 3.3380  | 1.8806       |
| GATS3p                      | Geary autocorrelation - lag 3 / weighted by atomic polarizabilities           | 0.4345  | 0.3241       |
| -O- [oxygen attach]         | -O- [oxygen attach] fragment count                                            | 0.7680  | 0.3864       |
| -C(=O)- [2 aromatic attach] | -C(=O)- [2 aromatic attach] fragment count                                    | 0.2305  | 0.0635       |
| Model intercept             | Intercept of multilinear regression model                                     | -5.5673 | 3.1301       |

\* value for 90% confidence interval

Model equation:  
Mutagenicity = -0.0338\*(SdssC\_acnt) - 0.1628\*(SaaaC\_acnt) + 0.0169\*(MDEC23) + 0.2630\*(MDEN23) - 1.0218\*(BELm4) + 3.3380\*(BELp1) + 0.4345\*(GATS3p) + 0.7680\*(-O- [oxygen attach]) + 0.2305\*(-C(=O)- [2 aromatic attach]) - 5.5673

### Descriptor Values

| Descriptor                  | Value  | Coefficient | Value × Coefficient |
|-----------------------------|--------|-------------|---------------------|
| SdssC_acnt                  | 1.0000 | -0.0338     | -0.03               |
| SaaaC_acnt                  | 0.0000 | -0.1628     | 0.00                |
| MDEC23                      | 0.0000 | 0.0169      | 0.00                |
| MDEN23                      | 0.0000 | 0.2630      | 0.00                |
| BELm4                       | 1.6503 | -1.0218     | -1.69               |
| BELp1                       | 2.2084 | 3.3380      | 7.37                |
| GATS3p                      | 0.7899 | 0.4345      | 0.34                |
| -O- [oxygen attach]         | 0.0000 | 0.7680      | 0.00                |
| -C(=O)- [2 aromatic attach] | 0.0000 | 0.2305      | 0.00                |
| Model intercept             | 1.0000 | -5.5673     | -5.5673             |
| Predicted value             |        |             | 0.43                |

Model # 9184

| Parameter           | Value        |
|---------------------|--------------|
| Endpoint            | Mutagenicity |
| Concordance         | 0.908        |
| Sensitivity         | 0.804        |
| Specificity         | 0.958        |
| Number of chemicals | 142          |
| Model               | 9184         |

| Model coefficients          |                                                                                            |         |                          |
|-----------------------------|--------------------------------------------------------------------------------------------|---------|--------------------------|
| Coefficient                 | Definition                                                                                 | Value   | Uncertainty <sup>a</sup> |
| SaaNH                       | Sum of ( aaNH ) E-States (SaaNH)                                                           | -0.0422 | 0.0307                   |
| SdssNp                      | Sum of ( = N+ < ) E-States (SdssNp)                                                        | -0.5950 | 0.3707                   |
| Saaac_acnt                  | Count of ( aaac ) (Saaac_acnt)                                                             | -0.0449 | 0.0250                   |
| numwHBd                     | Number of weak hydrogen bond donors (i.e. -CHX, where X = Cl, F)                           | 0.2750  | 0.1131                   |
| idm                         | Total information content on the distance magnitude                                        | 0.0000  | 0.0000                   |
| BELe5                       | Lowest eigenvalue n. 5 of Burden matrix / weighted by atomic Sanderson electronegativities | -0.6176 | 0.2662                   |
| MATS7p                      | Moran autocorrelation - lag 7 / weighted by atomic polarizabilities                        | 0.2182  | 0.2110                   |
| -CH< [aromatic attach]      | -CH< [aromatic attach] fragment count                                                      | 0.2336  | 0.0734                   |
| =C [aliphatic attach]       | =C [aliphatic attach] fragment count                                                       | -0.0718 | 0.0543                   |
| -O- [oxygen attach]         | -O- [oxygen attach] fragment count                                                         | 0.7999  | 0.3704                   |
| -C(=O)- [2 aromatic attach] | -C(=O)- [2 aromatic attach] fragment count                                                 | 0.1814  | 0.0514                   |
| Model intercept             | Intercept of multilinear regression model                                                  | 1.0578  | 0.3755                   |

<sup>a</sup> value for 90% confidence interval

Model equation:  
Mutagenicity = -0.0422\*(SaaNH) - 0.5950\*(SdssNp) - 0.0449\*(Saaac\_acnt) + 0.2750\*(numwHBd) + 0.0000\*(idm) - 0.6176\*(BELe5) + 0.2182\*(MATS7p) + 0.2336\*(-CH< [aromatic attach]) - 0.0718\*(=C [aliphatic attach]) + 0.7999\*(-O- [oxygen attach]) + 0.1814\*(-C(=O)- [2 aromatic attach]) + 1.0578

Descriptor Values

| Descriptor                  | Value      | Coefficient | Value × Coefficient |
|-----------------------------|------------|-------------|---------------------|
| SaaNH                       | 0.0000     | -0.0422     | 0.00                |
| SdssNp                      | 0.0000     | -0.5950     | 0.00                |
| Saaac_acnt                  | 0.0000     | -0.0449     | 0.00                |
| numwHBd                     | 0.0000     | 0.2750      | 0.00                |
| idm                         | 30874.8949 | 0.0000      | 0.01                |
| BELe5                       | 1.4061     | -0.6176     | -0.87               |
| MATS7p                      | -0.0510    | 0.2182      | -0.01               |
| -CH< [aromatic attach]      | 0.0000     | 0.2336      | 0.00                |
| =C [aliphatic attach]       | 0.0000     | -0.0718     | 0.00                |
| -O- [oxygen attach]         | 0.0000     | 0.7999      | 0.00                |
| -C(=O)- [2 aromatic attach] | 0.0000     | 0.1814      | 0.00                |
| Model intercept             | 1.0000     | 1.0578      | 1.0578              |
| Predicted value             |            |             | 0.19                |
